# Supplementary material for: Fractionation of stable carbon isotopes during formate consumption in anoxic rice paddy soils and lake sediments
Source: Copernicus journal article supplement (doi:10.5194/egusphere-2023-2279), 2023-11-03
Supplement: Supplementary file 1 [file egusphere-2023-2279-supplement.pdf]

## Legends of the supplemental figures

Fig. S1: Formate conversion to acetate, CH<sub>4</sub> and CO<sub>2</sub> in suspensions of paddy soil from the International Rice Research Institute (IRRI) after addition of formate without sulfate (blue squares) or formate plus sulfate (gypsum) (red triangles) without CH<sub>3</sub>F (open symbols) or with CH<sub>3</sub>F (closed symbols). Controls with addition of only water (blue or red X crosses) are only shown occasionally. The panels show the temporal change of (a) concentrations of formate, (b) concentrations of acetate, (c) mixing ratios of CH<sub>4</sub> (1 ppmv = 10<sup>-6</sup> bar), (d) mixing ratios of CO<sub>2</sub>, (e) δ<sup>13</sup>C of formate, (f) δ<sup>13</sup>C of acetate, (g) δ<sup>13</sup>C of CH<sub>4</sub>, and (h) δ<sup>13</sup>C of CO<sub>2</sub>. Means ± SE.

Fig. S2: Balance of produced acetate plus CH<sub>4</sub> (blue symbols) and of only CH<sub>4</sub> (red symbols) against the consumed formate in (a) the absence and (b) the presence of sulfate in paddy soil from the IRRI. The open and closed symbols denote conditions in the absence and the presence of CH<sub>3</sub>F, respectively. The different symbols indicate three different replicates. The line indicate equimolarity (in terms of reducing equivalents between substrate and product).

Fig. S3: Formate conversion to acetate, CH<sub>4</sub> and CO<sub>2</sub> in suspensions of sediment from the SW basin of Lake Fuchskuhle after addition of formate without sulfate (blue squares) or formate plus sulfate (gypsum) (red triangles) without CH<sub>3</sub>F (open symbols) or with CH<sub>3</sub>F (closed symbols). Controls with addition of only water (blue or red X crosses) are only shown occasionally. The panels show the temporal change of (a) concentrations of formate, (b) concentrations of acetate, (c) mixing ratios of CH<sub>4</sub> (1 ppmv = 10<sup>-6</sup> bar), (d) mixing ratios of CO<sub>2</sub>, (e) δ<sup>13</sup>C of formate, (f) δ<sup>13</sup>C of acetate, (g) δ<sup>13</sup>C of CH<sub>4</sub>, and (h) δ<sup>13</sup>C of CO<sub>2</sub>. Means ± SE.

Fig. S4: Balance of produced acetate plus CH<sub>4</sub> (blue symbols) and of only CH<sub>4</sub> (red symbols) against the consumed formate in (a) the absence and (b) the presence of sulfate in sediment from the SW basin of Lake Fuchskuhle. The open and closed symbols denote conditions in the absence and the presence of CH<sub>3</sub>F, respectively. The different symbols indicate three different replicates. The line indicate equimolarity (in terms of reducing equivalents between substrate and product).

Fig. S5: Mariotti plots of formate consumption in (a) paddy soil from the IRRI and (b, c) sediment from the SW basin of Lake Fuchskuhle under methanogenic (blue symbols) and sulfidogenic (red symbols) conditions both in the absence (open symbols) and in the presence (closed symbols) of CH<sub>3</sub>F. The different symbols indicate three different replicates.

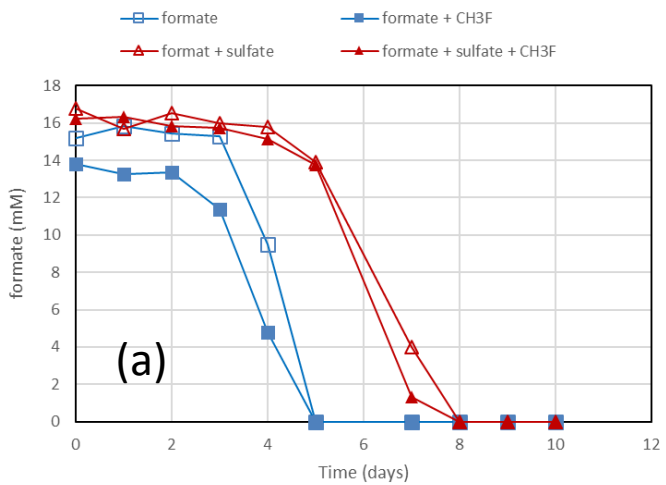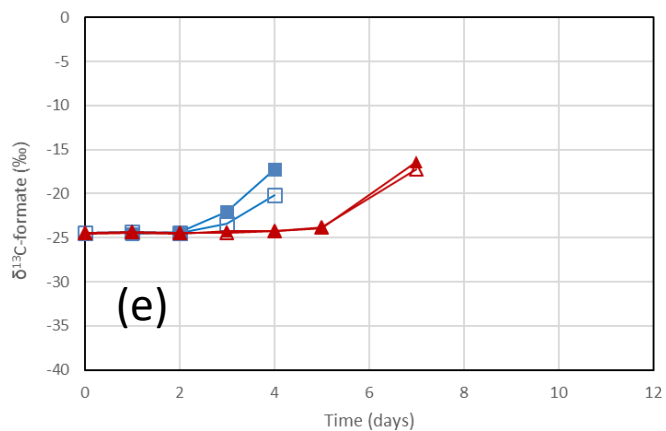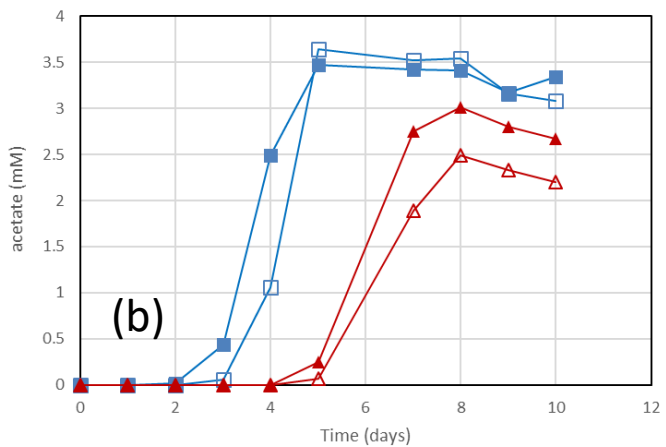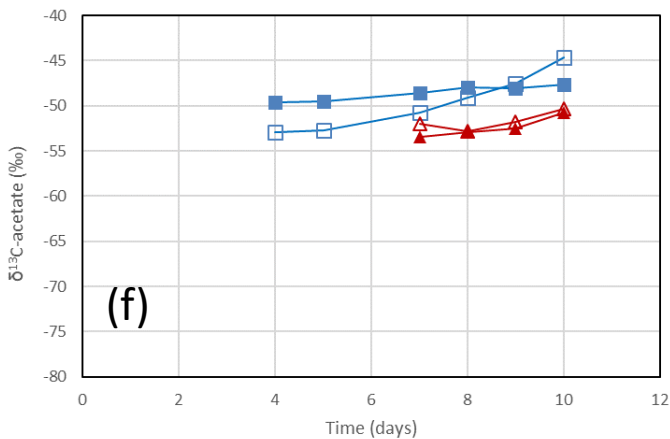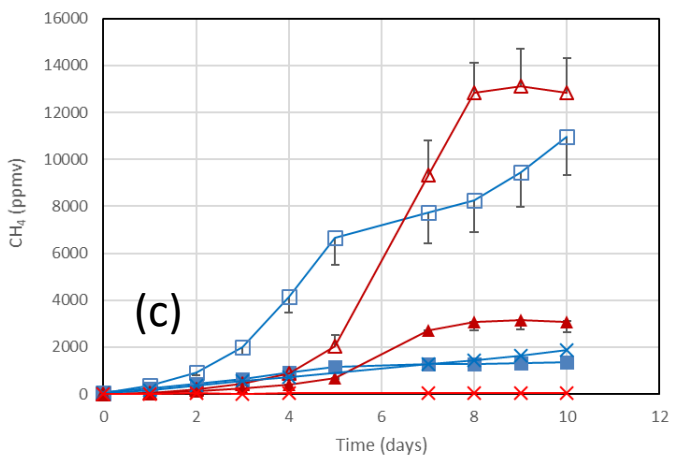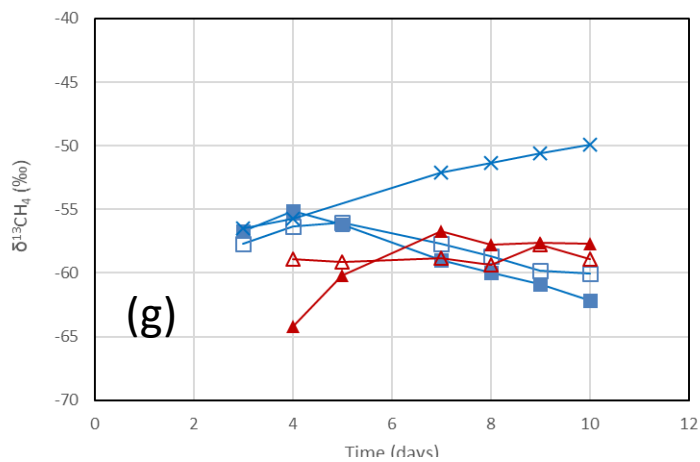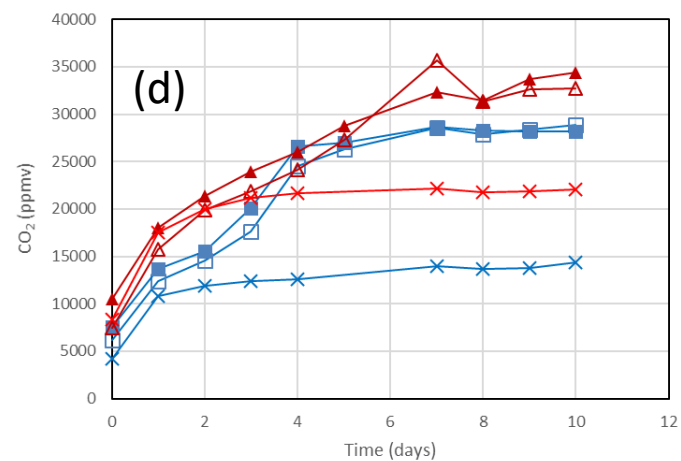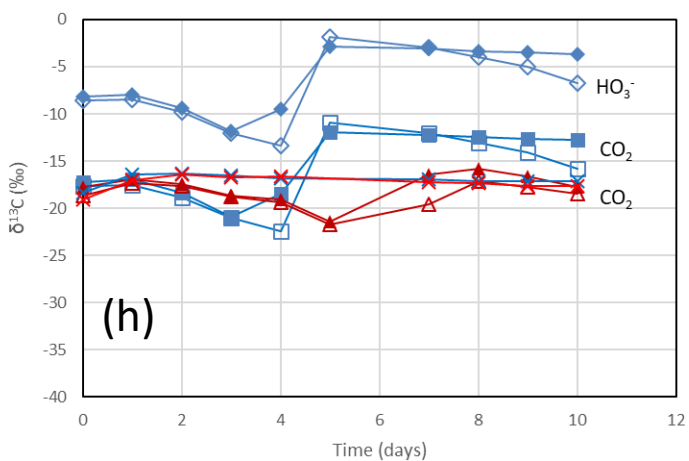

Fig. S1

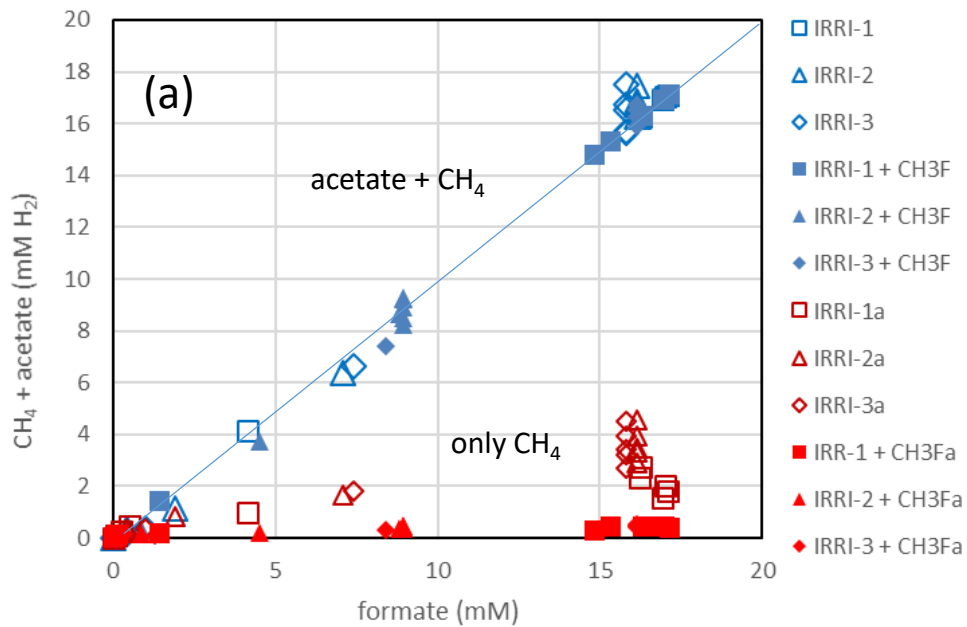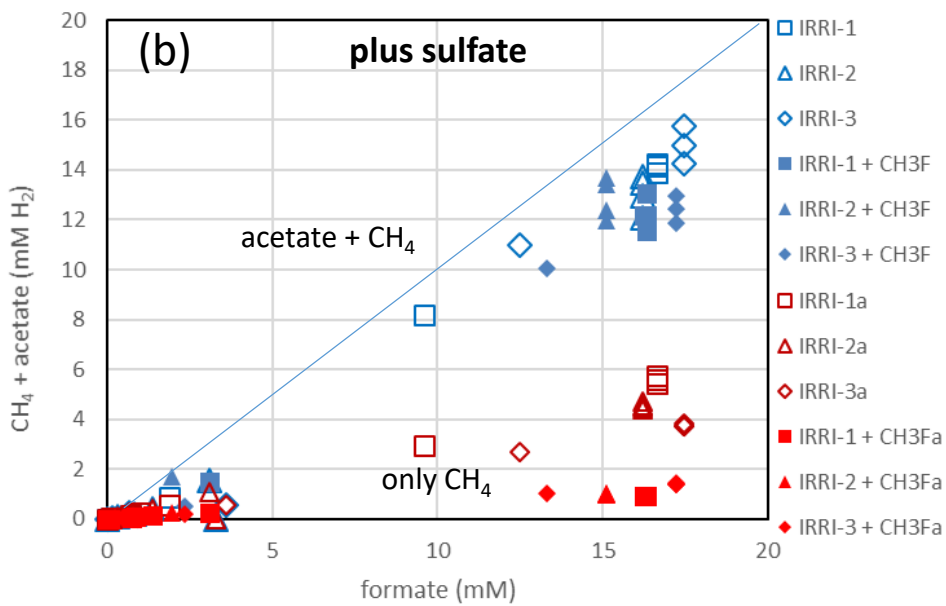

Fig. S2

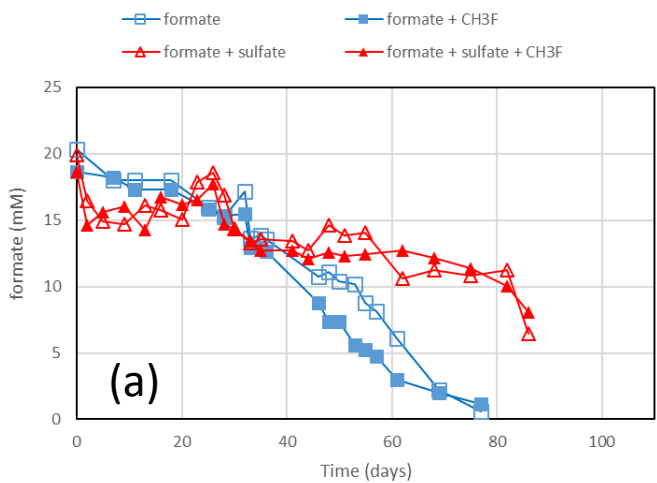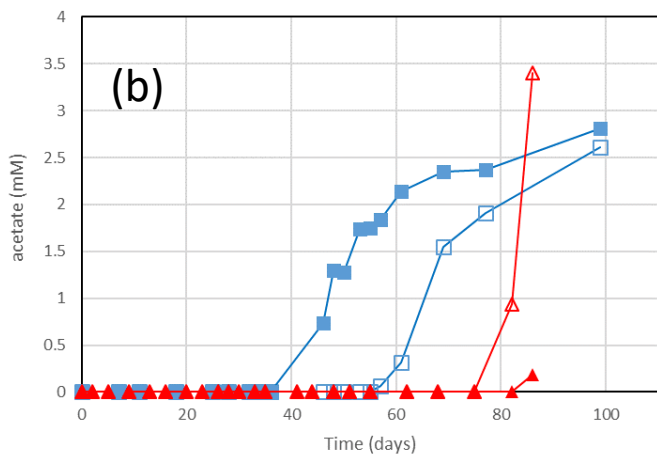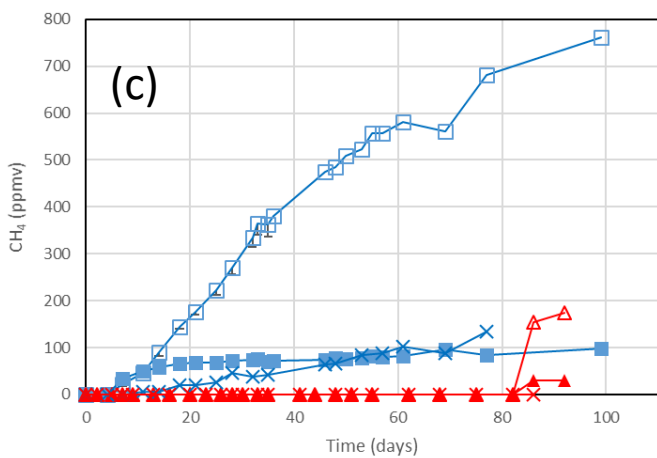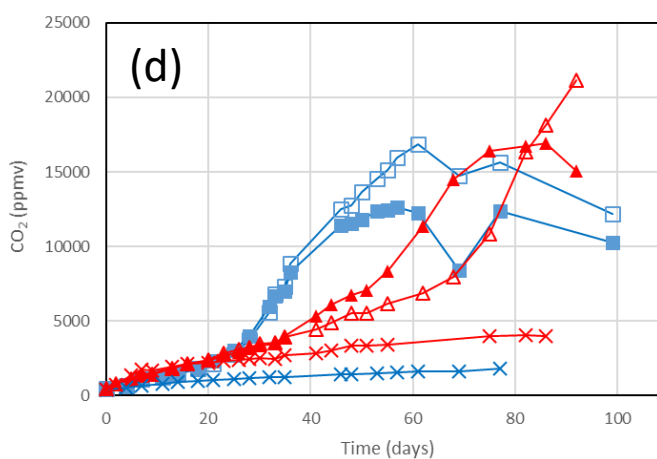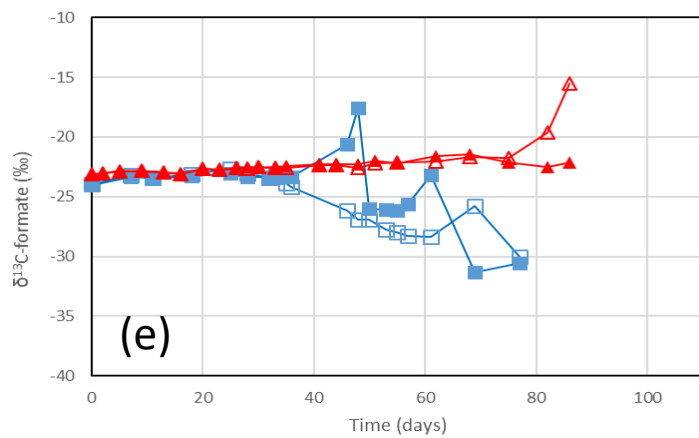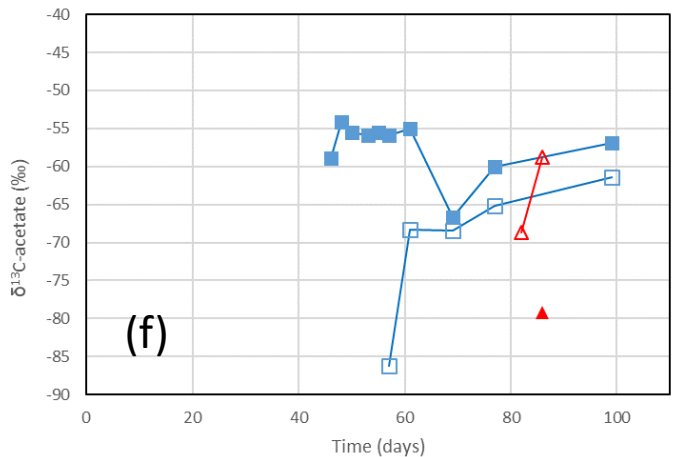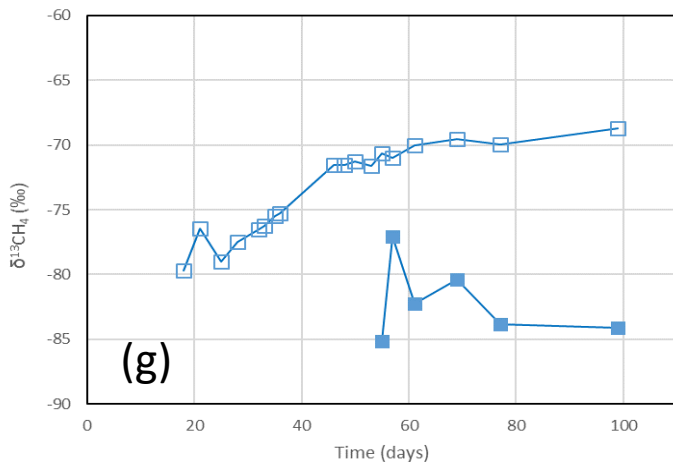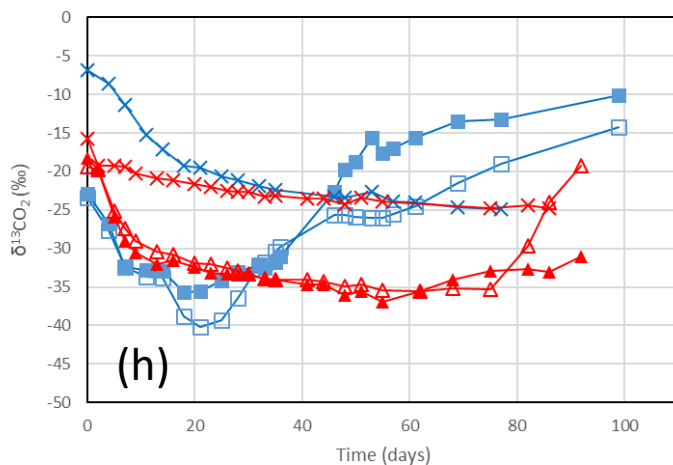

Fig. S3

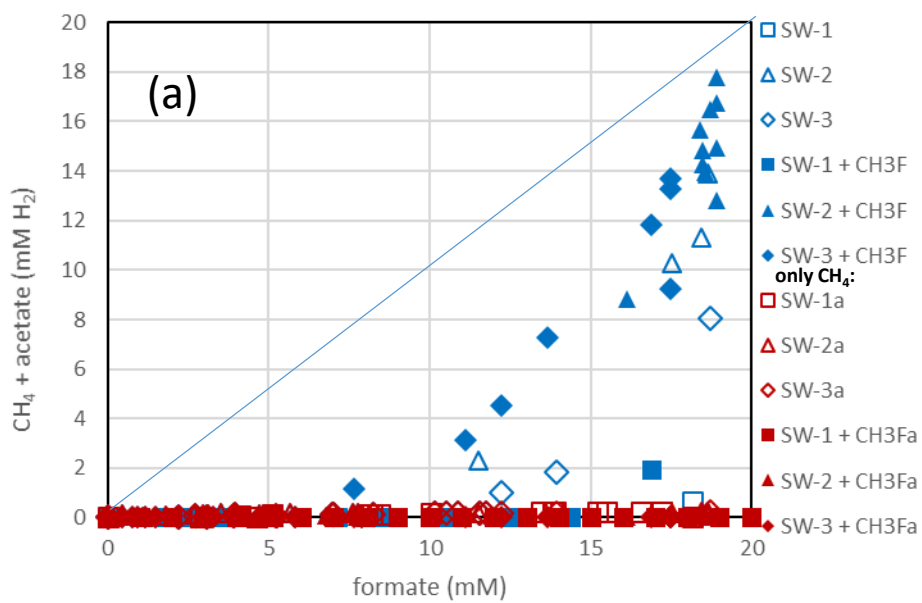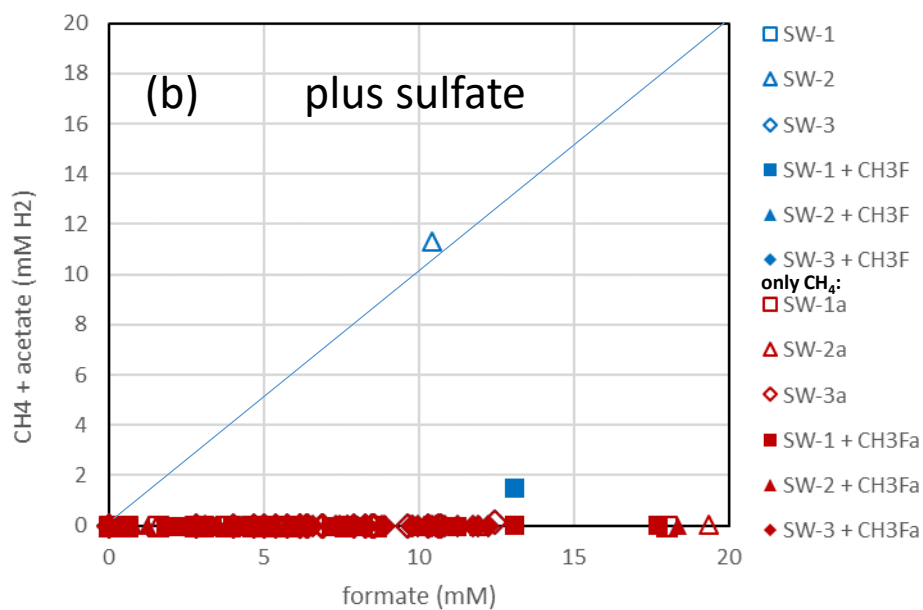

Fig. S4

IRRI

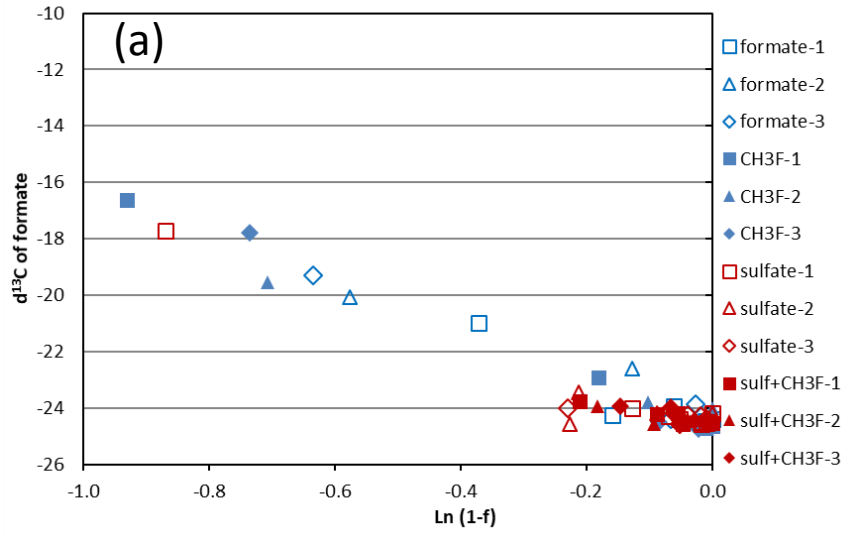

Fuchskuhle-SW

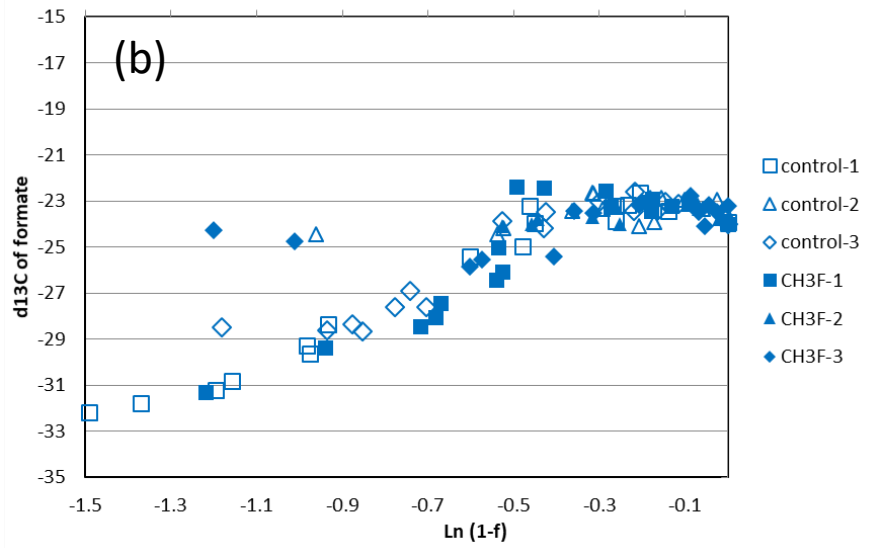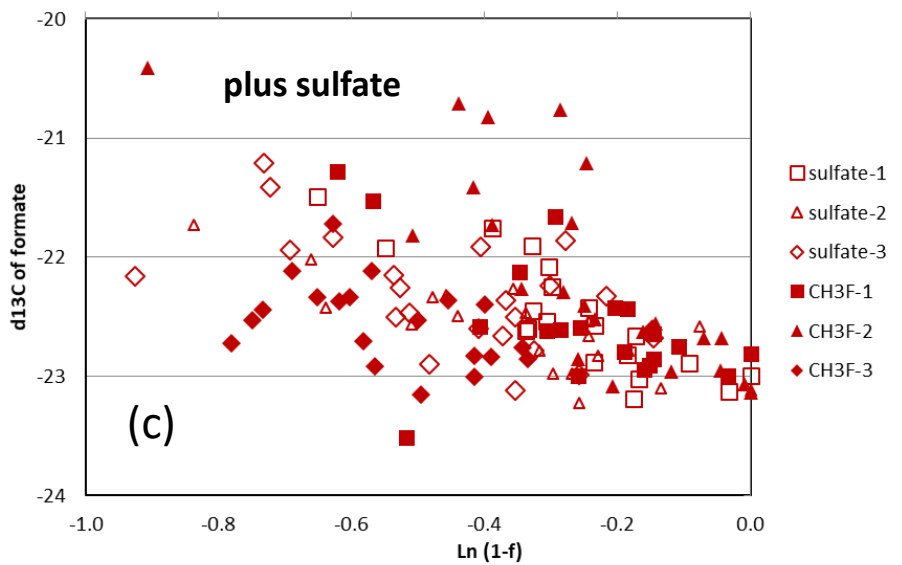

Fig. S5
